# Supplementary material for: Effects of Starch Overload and Cecal Buffering on Fecal Microbiota of Horses
Source: MDPI journal article supplement (doi:10.3390/ani12233435), 2022-12-06
Supplement: s1 [file s1]

Table S1. Parameters evaluated (movement, signs of abdominal discomfort, feces production, food intake, rectal temperature, heart rate) for each animal from starch-saline and starch-buffer treatments, during the experimental period.

|                 | SS   |      |      |      |      |      |                 | SB   |      |      |      |      |      |
|-----------------|------|------|------|------|------|------|-----------------|------|------|------|------|------|------|
|                 | T0   | T8   | T12  | T24  | T48  | T72  |                 | T0   | T8   | T12  | T24  | T48  | T72  |
| <b>ANIMAL 1</b> |      |      |      |      |      |      | <b>ANIMAL 6</b> |      |      |      |      |      |      |
| HR              | 40   | 60   | 60   | 52   | 40   | 36   |                 | 32   | 42   | 50   | 52   | 76   | 68   |
| T°C             | 37.1 | 37.5 | 37.8 | 37.2 | 37.4 | 37.8 |                 | 36.5 | 37.5 | 39.3 | 39.1 | 38.4 | 37.0 |
| Diarrhea        | -    | -    | -    | YES  | -    | -    |                 | -    | -    | YES  | YES  | YES  | -    |
| Hyporexia       | -    | -    | -    | -    | -    | -    |                 | -    | -    | -    | YES  | YES  | YES  |
| Decubitus       | -    | -    | -    | -    | -    | -    |                 | -    | -    | -    | -    | YES  | YES  |
| Dehydration     | -    | -    | -    | -    | -    | -    |                 | -    | -    | 5%   | 10%  | 10%  | 5%   |
| N° steps        | 8    | 8    | 8    | 8    | 10   | 8    |                 | 8    | 8    | 9    | 9    | 11   | 12   |
| Obel Grade      | -    | -    | -    | -    | -    | -    |                 | -    | -    | -    | -    | 2    | 4    |
| <b>ANIMAL 2</b> |      |      |      |      |      |      | <b>ANIMAL 7</b> |      |      |      |      |      |      |
| HR              | 36   | 56   | 40   | 40   | 44   | 80   |                 | 36   | 44   | 62   | 48   | 80   | 68   |
| T°C             | 37.1 | 37.9 | 37.6 | 37.1 | 38.4 | 38.5 |                 | 36.4 | 38.7 | 39.2 | 38.0 | 38.6 | 39.3 |
| Diarrhea        | -    | -    | -    | YES  | -    | -    |                 | -    | -    | YES  | YES  | YES  | -    |
| Hyporexia       | -    | -    | -    | -    | -    | -    |                 | -    | -    | -    | YES  | YES  | -    |
| Decubitus       | -    | -    | -    | -    | -    | -    |                 | -    | -    | YES  | -    | -    | -    |
| Dehydration     | -    | -    | -    | -    | -    | -    |                 | -    | -    | 5%   | 10%  | 10%  | -    |
| N° steps        | 8    | 8    | 8    | 8    | 10   | 10   |                 | 8    | 9    | 9    | 10   | 14   | 12   |
| Obel Grade      | -    | -    | -    | -    | 2    | 3    |                 | -    | -    | -    | -    | 2    | 3    |
| <b>ANIMAL 3</b> |      |      |      |      |      |      | <b>ANIMAL 8</b> |      |      |      |      |      |      |
| HR              | 40   | 56   | 56   | 56   | 52   | 64   |                 | 50   | 50   | 62   | 60   | 60   | 44   |
| T°C             | 37.4 | 37.6 | 37.8 | 38.0 | 37.6 | 37.3 |                 | 37.9 | 38.4 | 39.9 | 38.7 | 38.2 | 36.7 |
| Diarrhea        | -    | -    | -    | YES  | -    | -    |                 | -    | -    | -    | YES  | -    | -    |
| Hyporexia       | -    | -    | -    | -    | -    | -    |                 | -    | YES  | YES  | YES  | YES  | -    |
| Decubitus       | -    | -    | -    | -    | -    | -    |                 | -    | -    | -    | -    | -    | -    |
| Dehydration     | -    | -    | -    | -    | -    | -    |                 | -    | -    | -    | 5%   | -    | -    |
| N° steps        | 8    | 8    | 8    | 8    | 8    | 8    |                 | 9    | 9    | 9    | 9    | 12   | 10   |
| Obel Grade      | -    | -    | -    | -    | -    | -    |                 | -    | -    | -    | -    | 2    | -    |
| <b>ANIMAL 4</b> |      |      |      |      |      |      | <b>ANIMAL 9</b> |      |      |      |      |      |      |
| HR              | 44   | 60   | 56   | 56   | 60   | 64   |                 | 46   | 42   | 44   | 58   | 88   | 72   |

|                    |      |      |      |      |      |      |  |                  |      |      |      |      |      |
|--------------------|------|------|------|------|------|------|--|------------------|------|------|------|------|------|
| <b>T°C</b>         | 37.4 | 37.6 | 37.2 | 37.4 | 37.7 | 37.5 |  | 37.4             | 37.4 | 38.0 | 36.9 | 37.8 | 37.2 |
| <b>Diarrhea</b>    | -    | -    | -    | YES  | -    | -    |  | -                | -    | -    | YES  | YES  | -    |
| <b>Hyporexia</b>   | -    | -    | -    | -    | -    | -    |  | -                | YES  | YES  | YES  | YES  | YES  |
| <b>Decubitus</b>   | -    | -    | -    | -    | -    | -    |  | -                | YES  | -    | -    | -    | YES  |
| <b>Dehydration</b> | -    | -    | -    | -    | -    | -    |  | -                | -    | -    | 5%   | 5%   | 10%  |
| <b>N° steps</b>    | 8    | 8    | 8    | 8    | 8    | 8    |  | 7                | 9    | 9    | 9    | 12   | 10   |
| <b>Obel Grade</b>  | -    | -    | -    | -    | -    | -    |  | -                | -    | -    | -    | 3    | 3    |
| <b>ANIMAL 5</b>    |      |      |      |      |      |      |  | <b>ANIMAL 10</b> |      |      |      |      |      |
| <b>HR</b>          | 36   | 56   | 60   | 48   | 48   | 52   |  | 36               | 44   | 74   | 52   | 44   | 44   |
| <b>T°C</b>         | 37.2 | 37.9 | 38.2 | 37.5 | 37.4 | 37.4 |  | 38.1             | 38.8 | 19.9 | 38.5 | 37.5 | 37.5 |
| <b>Diarrhea</b>    | -    | -    | -    | YES  | -    | -    |  | -                | -    | YES  | YES  | -    | -    |
| <b>Hyporexia</b>   | -    | -    | -    | -    | -    | -    |  | -                | -    | -    | -    | YES  | -    |
| <b>Decubitus</b>   | -    | -    | -    | -    | -    | -    |  | -                | YES  | -    | -    | -    | -    |
| <b>Dehydration</b> | -    | -    | -    | -    | -    | -    |  | -                | 5%   | 5%   | 5%   | -    | -    |
| <b>N° steps</b>    | 8    | 8    | 8    | 8    | 9    | 10   |  | 8                | 8    | 8    | 9    | 10   | 8    |
| <b>Obel Grade</b>  | -    | -    | -    | -    | 2    | 2    |  | -                | -    | -    | -    | -    | -    |

SS = starch-saline; SB = starch-buffer; HR = heart rate (beats/minute); T°C = rectal temperature; N° steps = number of steps. T0 – before administration (starch overload and/or buffer); T8 – 8 hours administration; T12 – 12 hours after administration; T24 – 24 hours after administration; T48 – 48 hours after administration; T72 – 72 hours after administration.
