# Supplementary material for: Effects of Starch Overload and Cecal Buffering on Fecal Microbiota of Horses
Source: MDPI journal article supplement (doi:10.3390/ani12233435), 2022-12-06
Supplement: s1 [file s1]

Table S5. Pearson's product-moment correlation between the composition of bacterial phyla found in horses' fecal microbiota and clinical alterations related to acute laminitis in animals from starch-saline and starch-buffer treatments.

| SS          |              |      |                |      |               |      |            |      |                |      |              |      |
|-------------|--------------|------|----------------|------|---------------|------|------------|------|----------------|------|--------------|------|
| Observed    |              |      |                |      |               |      |            |      |                |      |              |      |
| Parameters  | Euryarcheota |      | Actinobacteria |      | Bacteroidetes |      | Firmicutes |      | Proteobacteria |      | Spirochaetes |      |
|             | r            | p    | r              | p    | r             | p    | r          | p    | r              | p    | r            | p    |
| HR          | 0.2          | .248 | 0.0            | .639 | 0.1           | .583 | 0.0        | .977 | -0.1           | .478 | 0.0          | .800 |
| T°C         | -0.1         | .739 | 0.5            | .011 | -0.1          | .501 | 0.1        | .716 | -0.2           | .333 | 0.0          | .830 |
| Diarrhea    | -0.3         | .139 | 0.4            | .017 | 0.3           | .157 | 0.5        | .004 | 0.6            | .001 | -0.3         | .080 |
| Inappetence | -0.2         | .461 | 0.0            | .991 | -0.1          | .513 | 0.5        | .004 | 0.6            | .002 | -0.1         | .479 |
| Decubitus   | 0.0          |      | 0.0            |      | 0.0           |      | 0.0        |      | 0.0            |      | 0.0          |      |
| Dehydration | -0.2         | .231 | 0.0            | .867 | 0.6           | .002 | 0.2        | .207 | 0.5            | .005 | -0.1         | .581 |
| N° steps    | -0.2         | .317 | 0.5            | .006 | -0.1          | .438 | 0.1        | .585 | 0.3            | .160 | 0.0          | .852 |
| Obel Grade  | 0.1          | .672 | 0.1            | .653 | -0.1          | .594 | 0.2        | .267 | 0.3            | .124 | -0.1         | .445 |

  

| SB          |              |      |                |      |               |      |            |      |                |      |              |      |
|-------------|--------------|------|----------------|------|---------------|------|------------|------|----------------|------|--------------|------|
|             | Euryarcheota |      | Actinobacteria |      | Bacteroidetes |      | Firmicutes |      | Proteobacteria |      | Spirochaetes |      |
|             | r            | p    | r              | p    | r             | p    | r          | p    | r              | p    | r            | p    |
| HR          | 0.1          | .735 | 0.6            | .002 | -0.1          | .783 | 0.3        | .073 | -0.1           | .777 | -0.4         | .017 |
| T°C         | 0.5          | .010 | -0.3           | .144 | -0.1          | .464 | 0.3        | .069 | -0.3           | .170 | -0.2         | .337 |
| Diarrhea    | -0.1         | .682 | 0.1            | .550 | -0.4          | .057 | 0.7        | .001 | -0.2           | .406 | -0.3         | .105 |
| Inappetence | 0.0          | .912 | 0.4            | .052 | 0.1           | .710 | 0.3        | .173 | 0.3            | .154 | -0.2         | .217 |
| Decubitus   | 0.0          | .847 | 0.4            | .019 | -0.1          | .496 | 0.3        | .158 | -0.1           | .701 | 0.1          | .452 |
| Dehydration | -0.2         | .333 | 0.5            | .003 | -0.4          | .041 | 0.5        | .003 | -0.2           | .387 | -0.3         | .070 |
| N° steps    | -0.2         | .391 | 0.3            | .071 | 0.3           | .060 | 0.2        | .428 | 0.3            | .115 | -0.3         | .094 |
| Obel Grade  | -0.3         | .168 | 0.7            | .001 | 0.1           | .757 | 0.0        | .934 | 0.0            | .989 | -0.3         | .148 |

SS = starch-saline; SB = starch-buffer; HR = heart rate (beats/minute); T°C = rectal temperature; N° steps = number of steps; r = correlation (negative -  $r < 0.1$  [beige]; weak -  $0.1 < r < 0.3$  [light blue]; moderate -  $0.4 < r < 0.6$  [blue]; strong -  $0.7 < r < 1.0$  [dark blue]).

Table S6. Pearson's product-moment correlation between the composition of bacterial families found in horses' fecal microbiota and clinical alterations related to acute laminitis in animals from starch-saline and starch-buffer treatments.

| SS                  |   |       |      |          |             |           |             |            |
|---------------------|---|-------|------|----------|-------------|-----------|-------------|------------|
| Observed Parameters |   |       |      |          |             |           |             |            |
|                     |   | HR    | T°C  | Diarrhea | Inappetence | Decubitus | Dehydration | N° steps   |
|                     |   |       |      |          |             |           |             | Obel Grade |
| Ruminococcaceae     | r | 0.5   | 0.1  | -0.5     | -0.4        | 0.0       | -0.4        | -0.3       |
|                     | p | .010  | .617 | .010     | .056        |           | .049        | .088       |
| Lachnospiraceae     | r | 0.2   | -0.2 | -0.3     | -0.3        | 0.0       | -0.1        | -0.4       |
|                     | p | .424  | .348 | .187     | .102        |           | .638        | .036       |
| Lactobacillaceae    | r | -0.3  | 0.0  | 0.5      | 0.6         | 0.0       | 0.2         | 0.4        |
|                     | p | .185  | .910 | .005     | <.001       |           | .317        | .049       |
| Prevotellaceae      | r | 0.0   | -0.1 | 0.2      | -0.1        | 0.0       | 0.5         | -0.2       |
|                     | p | .643  | .516 | .293     | .476        |           | .010        | .339       |
| Methanobacteriaceae | r | 0.2   | 0.0  | -0.3     | -0.1        | 0.0       | -0.2        | -0.2       |
|                     | p | .269  | .839 | .178     | .503        |           | .283        | .336       |
| Spirochaetaceae     | r | 0.0   | 0.0  | -0.4     | -0.2        | 0.0       | -0.1        | -0.2       |
|                     | p | .810  | .868 | .043     | .359        |           | .519        | .358       |
| Streptococcaceae    | r | -0.1  | 0.1  | 0.6      | 0.3         | 0.0       | 0.5         | 0.0        |
|                     | p | .567  | .595 | <.001    | .115        |           | .004        | .663       |
| Bifidobacteriaceae  | r | -0.1  | 0.4  | 0.5      | 0.0         | 0.0       | 0.0         | 0.6        |
|                     | p | .615  | .015 | .010     | .821        |           | .917        | .002       |
| Erysipelotrichaceae | r | 0.0   | 0.4  | 0.4      | 0.0         | 0.0       | 0.0         | 0.4        |
|                     | p | .919  | .016 | .045     | .673        |           | .886        | .035       |
| Eubacteriaceae      | r | 0.0   | 0.0  | -0.5     | -0.3        | 0.0       | -0.4        | -0.3       |
|                     | p | .690  | .742 | .006     | .089        |           | .045        | .072       |
| SB                  |   |       |      |          |             |           |             |            |
| Ruminococcaceae     | r | -0.6  | -0.4 | -0.7     | -0.4        | 0.0       | -0.6        | -0.3       |
|                     | p | <.001 | .019 | <.001    | .024        | .957      | <.001       | .116       |
| Lachnospiraceae     | r | -0.6  | -0.3 | -0.6     | -0.4        | 0.0       | -0.7        | -0.4       |
|                     | p | <.001 | .110 | <.001    | .046        | .899      | <.001       | .035       |
| Lactobacillaceae    | r | 0.2   | 0.0  | 0.6      | 0.3         | -0.2      | 0.6         | 0.0        |
|                     | p | .335  | .809 | .001     | .090        | .385      | <.001       | .886       |

|                            |          |       |      |       |      |      |       |       |       |
|----------------------------|----------|-------|------|-------|------|------|-------|-------|-------|
| <b>Prevotellaceae</b>      | <b>r</b> | -0.1  | -0.1 | -0.3  | 0.0  | -0.1 | -0.4  | 0.3   | 0.0   |
|                            | <b>p</b> | .542  | .535 | .058  | .791 | .470 | .033  | .155  | >.999 |
| <b>Methanobacteriaceae</b> | <b>r</b> | 0.1   | 0.5  | -0.1  | 0.0  | 0.0  | -0.2  | -0.2  | -0.3  |
|                            | <b>p</b> | .669  | .008 | .643  | .854 | .883 | .344  | .408  | .183  |
| <b>Spirochaetaceae</b>     | <b>r</b> | -0.4  | -0.1 | -0.3  | -0.2 | 0.2  | -0.3  | -0.3  | -0.3  |
|                            | <b>p</b> | .041  | .588 | .169  | .310 | .389 | .114  | .155  | .168  |
| <b>Streptococcaceae</b>    | <b>r</b> | 0.2   | 0.4  | 0.5   | 0.2  | -0.2 | 0.3   | -0.1  | -0.2  |
|                            | <b>p</b> | .314  | .019 | .003  | .368 | .268 | .124  | .605  | .284  |
| <b>Bifidobacteriaceae</b>  | <b>r</b> | 0.5   | -0.3 | 0.1   | 0.3  | 0.4  | 0.5   | 0.3   | 0.7   |
|                            | <b>p</b> | .002  | .148 | .576  | .059 | .020 | .003  | .098  | <.001 |
| <b>Erysipelotrichaceae</b> | <b>r</b> | 0.4   | 0.0  | 0.1   | 0.1  | 0.1  | 0.2   | 0.8   | 0.5   |
|                            | <b>p</b> | .014  | .963 | .612  | .468 | .688 | .294  | <.001 | .002  |
| <b>Eubacteriaceae</b>      | <b>r</b> | -0.6  | -0.4 | -0.7  | -0.4 | 0.0  | -0.6  | -0.3  | -0.2  |
|                            | <b>p</b> | <.001 | .019 | <.001 | .024 | .957 | <.001 | .116  | .265  |

---

SS = starch-saline; SB = starch-buffer; HR = heart rate (beats/minute); T°C = rectal temperature; N° steps = number of steps; r = correlation (negative -  $r < 0.1$  [beige]; weak -  $0.1 < r < 0.3$  [light blue]; moderate -  $0.4 < r < 0.6$  [blue]; strong -  $0.7 < r < 1.0$  [dark blue]).

Table S7. Pearson's product-moment correlation between the composition of bacterial genera found in horses' fecal microbiota and clinical alterations related to acute laminitis in animals from starch-saline and starch-buffer treatments.

| SS                   |   |                     |      |          |             |           |             |          |            |
|----------------------|---|---------------------|------|----------|-------------|-----------|-------------|----------|------------|
|                      |   | Observed Parameters |      |          |             |           |             |          |            |
|                      |   | HR                  | T°C  | Diarrhea | Inappetence | Decubitus | Dehydration | N° steps | Obel Grade |
| Clostridium_XIVa     | r | 0.2                 | -0.2 | -0.3     | -0.3        | 0.0       | -0.1        | -0.3     | -0.4       |
|                      | p | .421                | .387 | .107     | .077        |           | .539        | .091     | .059       |
| Ruminococcaceae*     | r | 0.4                 | 0.0  | -0.3     | -0.3        | 0.0       | -0.3        | -0.3     | -0.1       |
|                      | p | .032                | .866 | .067     | .114        |           | .098        | .083     | .608       |
| Lactobacillus        | r | -0.3                | 0.0  | 0.5      | 0.6         | 0.0       | 0.2         | 0.4      | 0.3        |
|                      | p | .187                | .930 | .005     | <.001       |           | .315        | .053     | .138       |
| Methanobrevibacter   | r | 0.2                 | 0.0  | -0.3     | -0.1        | 0.0       | -0.2        | -0.2     | 0.1        |
|                      | p | .262                | .805 | .182     | .502        |           | .295        | .329     | .599       |
| Prevotella           | r | 0.0                 | -0.2 | 0.3      | -0.1        | 0.0       | 0.5         | -0.2     | -0.2       |
|                      | p | .828                | .400 | .176     | .575        |           | .004        | .410     | .406       |
| Treponema            | r | 0.0                 | 0.0  | -0.3     | -0.1        | 0.0       | -0.1        | 0.0      | -0.1       |
|                      | p | .800                | .830 | .080     | .479        |           | .581        | .852     | .445       |
| Lachnospiraceae*     | r | 0.2                 | 0.0  | -0.2     | -0.3        | 0.0       | -0.2        | -0.4     | -0.1       |
|                      | p | .266                | .741 | .192     | .157        |           | .403        | .038     | .451       |
| Streptococcus        | r | -0.1                | 0.1  | 0.6      | 0.3         | 0.0       | 0.5         | 0.1      | 0.1        |
|                      | p | .539                | .566 | <.001    | .125        |           | .006        | .609     | .626       |
| Bifidobacterium      | r | -0.1                | 0.5  | 0.5      | 0.0         | 0.0       | 0.0         | 0.5      | 0.1        |
|                      | p | .666                | .013 | .012     | .869        |           | .954        | .002     | .509       |
| Clostridium_III      | r | 0.2                 | 0.0  | -0.5     | -0.3        | 0.0       | -0.4        | -0.4     | -0.3       |
|                      | p | .409                | .912 | .005     | .070        |           | .034        | .043     | .093       |
| Erysipelotrichaceae* | r | 0.0                 | 0.4  | 0.4      | -0.1        | 0.0       | 0.0         | 0.4      | 0.1        |
|                      | p | .875                | .053 | .024     | .750        |           | .819        | .031     | .529       |
| Ruminococcus         | r | 0.0                 | 0.0  | -0.3     | -0.2        | 0.0       | -0.2        | -0.1     | -0.2       |
|                      | p | .900                | .995 | .080     | .298        |           | .322        | .774     | .202       |
| Eubacterium          | r | 0.1                 | -0.1 | -0.5     | -0.3        | 0.0       | -0.4        | -0.3     | -0.3       |
|                      | p | .707                | .767 | .006     | .113        |           | .034        | .103     | .127       |
| SB                   |   |                     |      |          |             |           |             |          |            |
| Clostridium_XIVa     | r | -0.6                | -0.3 | -0.5     | -0.4        | 0.0       | -0.5        | -0.6     | -0.3       |
|                      | p | <.001               | .124 | .006     | .020        | .860      | .002        | .012     | .075       |
| Ruminococcaceae*     | r | -0.6                | -0.2 | -0.5     | -0.5        | 0.0       | -0.5        | -0.5     | -0.3       |
|                      | p | <.001               | .253 | .008     | .005        | .853      | .006        | .010     | .068       |
| Lactobacillus        | r | 0.2                 | 0.0  | 0.6      | 0.3         | -0.2      | 0.6         | 0.0      | 0.0        |
|                      | p | .351                | .806 | .001     | .102        | .365      | <.001       | .864     | .793       |
| Methanobrevibacter   | r | 0.1                 | 0.5  | -0.1     | 0.0         | 0.0       | -0.2        | -0.2     | -0.2       |
|                      | p | .655                | .007 | .672     | .852        | .866      | .352        | .428     | .193       |
| Prevotella           | r | -0.1                | -0.1 | -0.3     | 0.1         | -0.1      | -0.4        | 0.3      | 0.0        |
|                      | p | .688                | .575 | .085     | .703        | .441      | .050        | .120     | .895       |
| Treponema            | r | -0.4                | -0.2 | -0.3     | -0.2        | 0.1       | -0.3        | -0.3     | -0.3       |
|                      | p | .017                | .337 | .105     | .217        | .452      | .070        | .094     | .148       |
| Lachnospiraceae*     | r | -0.6                | -0.2 | -0.6     | -0.6        | 0.0       | -0.6        | -0.5     | -0.3       |
|                      | p | <.001               | .247 | .001     | <.001       | .909      | <.001       | .009     | .073       |

|                             |          |       |      |       |      |      |       |       |       |
|-----------------------------|----------|-------|------|-------|------|------|-------|-------|-------|
| <b>Streptococcus</b>        | <b>r</b> | 0.2   | 0.4  | 0.5   | 0.2  | -0.2 | 0.3   | -0.1  | -0.2  |
|                             | <b>p</b> | .329  | .021 | .003  | .358 | .264 | .120  | .587  | .269  |
| <b>Bifidobacterium</b>      | <b>r</b> | 0.5   | -0.3 | 0.1   | 0.4  | 0.4  | 0.5   | 0.3   | 0.7   |
|                             | <b>p</b> | .002  | .152 | .558  | .056 | .019 | .003  | .095  | <.001 |
| <b>Clostridium_III</b>      | <b>r</b> | -0.6  | -0.2 | -0.5  | -0.5 | 0.0  | -0.5  | -0.5  | -0.3  |
|                             | <b>p</b> | <.001 | .213 | .009  | .006 | .952 | .006  | .006  | .058  |
| <b>Erysipelotrichaceae*</b> | <b>r</b> | 0.4   | 0.0  | 0.1   | 0.1  | 0.1  | 0.2   | 0.8   | 0.5   |
|                             | <b>p</b> | .013  | .944 | .599  | .459 | .710 | .289  | <.001 | .002  |
| <b>Ruminococcus</b>         | <b>r</b> | -0.6  | -0.3 | -0.5  | -0.5 | -0.1 | -0.5  | -0.5  | -0.3  |
|                             | <b>p</b> | .001  | .180 | .009  | .009 | .447 | .004  | .013  | .083  |
| <b>Eubacterium</b>          | <b>r</b> | -0.5  | -0.4 | -0.6  | -0.4 | 0.0  | -0.6  | -0.2  | -0.2  |
|                             | <b>p</b> | .004  | .033 | <.001 | .036 | .831 | <.001 | .200  | .366  |

SS = starch-saline; SB = starch-buffer; HR = heart rate (beats/minute); T°C = rectal temperature;

N° steps = number of steps; r = correlation (negative -  $r < 0.1$  [beige]; weak -  $0.1 < r < 0.3$  [light blue];

moderate -  $0.4 < r < 0.6$  [blue]; strong -  $0.7 < r < 1.0$  [dark blue]).
