# Supplementary material for: Effects of Starch Overload and Cecal Buffering on Fecal Microbiota of Horses
Source: MDPI journal article supplement (doi:10.3390/ani12233435), 2022-12-06

Figure S1. Production and characteristics of horses' feces before and after starch overload. (A) before overload - feces in cymbals and normal consistency; (B) 12 to 24 hours after overload - pasty feces with white color; (C) 48 hours after overload - feces returning to cymbals and normal consistency.

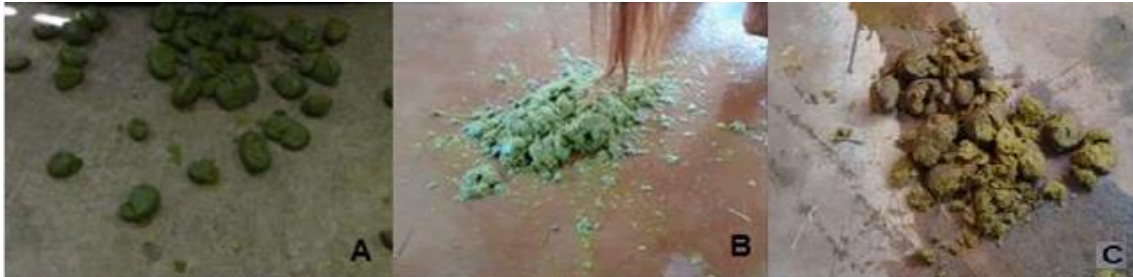

Supplement: s1 [file s1]
