# Supplementary material for: Effects of Starch Overload and Cecal Buffering on Fecal Microbiota of Horses
Source: MDPI journal article supplement (doi:10.3390/ani12233435), 2022-12-06
Supplement: s1 [file s1]

Table S2. Variation in the relative abundance of the bacterial phyla in the feces of horses 72 hours following treatments.

| Phylum         | Treatments | Time               |                    |                      |                     |                     |                      | Time            | T*T             |
|----------------|------------|--------------------|--------------------|----------------------|---------------------|---------------------|----------------------|-----------------|-----------------|
|                |            | T0                 | T8                 | T12                  | T24                 | T48                 | T72                  | P value         |                 |
| Actinobacteria | WS         | 0.011              | 0.009              | 0.009                | 0.006               | 0.008               | 0.006 <sup>B</sup>   | <b>.014</b>     | <b>.011</b>     |
|                | WB         | 0.010              | 0.005              | 0.004                | 0.008               | 0.004               | 0.008 <sup>B</sup>   |                 |                 |
|                | SS         | 0.012              | 0.009              | 0.007                | 0.013               | 0.055               | 0.023 <sup>B</sup>   |                 |                 |
|                | SB         | 0.008 <sup>b</sup> | 0.005 <sup>b</sup> | 0.004 <sup>b</sup>   | 0.033 <sup>b</sup>  | 0.156 <sup>ab</sup> | 0.201 <sup>Aa</sup>  |                 |                 |
| Bacteroidetes  | WS         | 0.018              | 0.016              | 0.012                | 0.019               | 0.014 <sup>B</sup>  | 0.026 <sup>B</sup>   | <b>.013</b>     | <b>&lt;.001</b> |
|                | WB         | 0.019              | 0.027              | 0.020                | 0.019               | 0.035 <sup>B</sup>  | 0.028 <sup>B</sup>   |                 |                 |
|                | SS         | 0.017              | 0.023              | 0.026                | 0.068               | 0.025 <sup>B</sup>  | 0.025 <sup>B</sup>   |                 |                 |
|                | SB         | 0.021 <sup>b</sup> | 0.030 <sup>b</sup> | 0.002 <sup>b</sup>   | 0.001 <sup>b</sup>  | 0.218 <sup>Aa</sup> | 0.184 <sup>Aa</sup>  |                 |                 |
| Euryarcheota   | WS         | 0.054              | 0.040              | 0.061 <sup>A</sup>   | 0.022               | 0.021               | 0.016 <sup>A</sup>   | <b>.001</b>     | <b>.006</b>     |
|                | WB         | 0.050              | 0.020              | 0.030 <sup>A</sup>   | 0.039               | 0.001               | 0.040 <sup>A</sup>   |                 |                 |
|                | SS         | 0.036              | 0.015              | 0.019 <sup>A</sup>   | 0.011               | 0.012               | 0.049 <sup>A</sup>   |                 |                 |
|                | SB         | 0.035 <sup>a</sup> | 0.030 <sup>a</sup> | 0.134 <sup>Bc</sup>  | 0.025 <sup>a</sup>  | 0.003 <sup>b</sup>  | <0.001 <sup>Bb</sup> |                 |                 |
| Firmicutes     | WS         | 0.446              | 0.443              | 0.354 <sup>B</sup>   | 0.397 <sup>B</sup>  | 0.376               | 0.342                | <b>&lt;.001</b> | <b>&lt;.001</b> |
|                | WB         | 0.333              | 0.288              | 0.288 <sup>B</sup>   | 0.348 <sup>B</sup>  | 0.347               | 0.339                |                 |                 |
|                | SS         | 0.306              | 0.325              | 0.363 <sup>B</sup>   | 0.440 <sup>B</sup>  | 0.511               | 0.364                |                 |                 |
|                | SB         | 0.362 <sup>c</sup> | 0.330 <sup>c</sup> | 0.732 <sup>Aab</sup> | 0.906 <sup>Aa</sup> | 0.592 <sup>bc</sup> | 0.530 <sup>bc</sup>  |                 |                 |
| Proteobacteria | WS         | 0.004              | 0.003              | 0.001                | 0.006 <sup>B</sup>  | 0.002               | 0.003                | <b>.006</b>     | <b>.050</b>     |
|                | WB         | 0.009              | 0.008              | 0.009                | 0.006 <sup>B</sup>  | 0.002               | 0.008                |                 |                 |
|                | SS         | 0.010 <sup>b</sup> | 0.006 <sup>b</sup> | 0.009 <sup>b</sup>   | 0.059 <sup>Aa</sup> | 0.018 <sup>ab</sup> | 0.009 <sup>b</sup>   |                 |                 |
|                | SB         | 0.002              | 0.002              | 0.001                | 0.002 <sup>B</sup>  | 0.008               | 0.004                |                 |                 |
| Spirochaetes   | WS         | 0.029              | 0.030              | 0.035                | 0.028               | 0.027               | 0.040 <sup>A</sup>   | <b>.002</b>     | <b>&lt;.001</b> |
|                | WB         | 0.022              | 0.028              | 0.024                | 0.018               | 0.039               | 0.030 <sup>A</sup>   |                 |                 |
|                | SS         | 0.026              | 0.024              | 0.018                | 0.011               | 0.017               | 0.011 <sup>A</sup>   |                 |                 |
|                | SB         | 0.017 <sup>a</sup> | 0.047 <sup>a</sup> | 0.006 <sup>b</sup>   | 0.002 <sup>b</sup>  | 0.001 <sup>b</sup>  | <0.001 <sup>Bb</sup> |                 |                 |

WS = water-saline; WB = water-buffer; SS = starch-saline; SB = starch-buffer. T\*T = interaction treatment/time. T0 – before gastric administration of water or starch; T8 - 08h; T12 - 12h; T24 - 24h; T48 - 48h; T72 - 72h. The means are represented: different lowercase letters on the same line, and different uppercase letters in the same column differed statistically ( $p<0.05$ ; Tukey's test).

Table S3. Variation in the relative abundance of the bacterial families in the feces of horses 72 hours following treatments.

| Family              | Treatment | Time                |                     |                     |                     |                     |                      | Time    | T*T   |
|---------------------|-----------|---------------------|---------------------|---------------------|---------------------|---------------------|----------------------|---------|-------|
|                     |           | T0                  | T8                  | T12                 | T24                 | T48                 | T72                  | P value |       |
| Bifidobacteriaceae  | WS        | <0.001              | <0.001              | <0.001              | <0.001              | <0.001 <sup>B</sup> | <0.001 <sup>B</sup>  | .015    | .020  |
|                     | WB        | <0.001              | <0.001              | <0.001              | <0.001              | <0.001 <sup>B</sup> | <0.001 <sup>B</sup>  |         |       |
|                     | SS        | <0.001              | <0.001              | <0.001              | 0.007               | 0.050 <sup>B</sup>  | 0.015 <sup>B</sup>   |         |       |
|                     | SB        | <0.001 <sup>b</sup> | <0.001 <sup>b</sup> | <0.001 <sup>b</sup> | 0.031 <sup>b</sup>  | 0.146 <sup>Aa</sup> | 0.195 <sup>Aa</sup>  |         |       |
| Erysipelothricaceae | WS        | <0.001              | 0.001               | 0.001               | 0.001               | 0.001 <sup>B</sup>  | 0.001 <sup>B</sup>   | .001    | <.001 |
|                     | WB        | 0.002               | 0.002               | 0.003               | 0.003               | 0.001 <sup>B</sup>  | 0.002 <sup>B</sup>   |         |       |
|                     | SS        | 0.001               | 0.001               | 0.002               | 0.005               | 0.007 <sup>B</sup>  | 0.004 <sup>B</sup>   |         |       |
|                     | SB        | 0.001 <sup>b</sup>  | <0.001 <sup>b</sup> | <0.001 <sup>b</sup> | 0.002 <sup>b</sup>  | 0.185 <sup>Aa</sup> | 0.180 <sup>Aa</sup>  |         |       |
| Eubacteriaceae      | WS        | 0.015               | 0.021               | 0.015 <sup>A</sup>  | 0.014 <sup>A</sup>  | 0.015 <sup>A</sup>  | 0.013                | <.001   | <.001 |
|                     | WB        | 0.020               | 0.014               | 0.012 <sup>A</sup>  | 0.017 <sup>A</sup>  | 0.018 <sup>A</sup>  | 0.014                |         |       |
|                     | SS        | 0.016 <sup>a</sup>  | 0.018 <sup>a</sup>  | 0.017 <sup>Aa</sup> | 0.006 <sup>Bb</sup> | 0.006 <sup>Bb</sup> | 0.013 <sup>a</sup>   |         |       |
|                     | SB        | 0.017 <sup>a</sup>  | 0.014 <sup>a</sup>  | 0.003 <sup>Bb</sup> | 0.004 <sup>Bb</sup> | 0.003 <sup>Bb</sup> | 0.010 <sup>ab</sup>  |         |       |
| Lachnospiraceae     | WS        | 0.097               | 0.124               | 0.090 <sup>A</sup>  | 0.112 <sup>A</sup>  | 0.097 <sup>A</sup>  | 0.111 <sup>A</sup>   | .017    | <.001 |
|                     | WB        | 0.117               | 0.100               | 0.085 <sup>A</sup>  | 0.109 <sup>A</sup>  | 0.088 <sup>A</sup>  | 0.134 <sup>A</sup>   |         |       |
|                     | SS        | 0.103               | 0.100               | 0.133 <sup>A</sup>  | 0.146 <sup>A</sup>  | 0.076 <sup>A</sup>  | 0.085 <sup>A</sup>   |         |       |
|                     | SB        | 0.111 <sup>a</sup>  | 0.099 <sup>a</sup>  | 0.019 <sup>Bb</sup> | 0.006 <sup>Bb</sup> | 0.032 <sup>Bb</sup> | 0.026 <sup>Bb</sup>  |         |       |
| Lactobacillaceae    | WS        | <0.001              | 0.001               | <0.001              | <0.001 <sup>B</sup> | 0.002 <sup>B</sup>  | 0.001                | <.001   | <.001 |
|                     | WB        | 0.005               | 0.004               | 0.003               | 0.007 <sup>B</sup>  | 0.036 <sup>B</sup>  | 0.015                |         |       |
|                     | SS        | 0.004 <sup>b</sup>  | 0.006 <sup>b</sup>  | 0.004 <sup>b</sup>  | 0.073 <sup>Bb</sup> | 0.233 <sup>Aa</sup> | 0.046 <sup>b</sup>   |         |       |
|                     | SB        | 0.002 <sup>b</sup>  | 0.001 <sup>b</sup>  | 0.050 <sup>b</sup>  | 0.254 <sup>Aa</sup> | 0.096 <sup>Aa</sup> | 0.055 <sup>b</sup>   |         |       |
| Methanobacteriaceae | WS        | 0.052               | 0.037               | 0.057 <sup>A</sup>  | 0.019               | 0.016 <sup>A</sup>  | 0.013 <sup>A</sup>   | .002    | .003  |
|                     | WB        | 0.046               | 0.017               | 0.027 <sup>A</sup>  | 0.037               | 0.019 <sup>A</sup>  | 0.037 <sup>A</sup>   |         |       |
|                     | SS        | 0.031               | 0.012               | 0.013 <sup>A</sup>  | 0.009               | 0.012 <sup>A</sup>  | 0.049 <sup>A</sup>   |         |       |
|                     | SB        | 0.031 <sup>a</sup>  | 0.025 <sup>a</sup>  | 0.130 <sup>Bc</sup> | 0.022 <sup>a</sup>  | 0.002 <sup>Bb</sup> | <0.001 <sup>Bb</sup> |         |       |

|                  |                    |                    |                     |                     |                     |                      |                 |                 |  |
|------------------|--------------------|--------------------|---------------------|---------------------|---------------------|----------------------|-----------------|-----------------|--|
| Prevotellaceae   |                    |                    |                     |                     |                     |                      |                 |                 |  |
| WS               | 0.017              | 0.015              | 0.012               | 0.018               | 0.014 <sup>B</sup>  | 0.025 <sup>B</sup>   | <b>.038</b>     | <b>.004</b>     |  |
| WB               | 0.017              | 0.025              | 0.018               | 0.015               | 0.031 <sup>B</sup>  | 0.026 <sup>B</sup>   |                 |                 |  |
| SS               | 0.015              | 0.020              | 0.024               | 0.062               | 0.021 <sup>B</sup>  | 0.017 <sup>B</sup>   |                 |                 |  |
| SB               | 0.018 <sup>b</sup> | 0.029 <sup>b</sup> | 0.002 <sup>b</sup>  | <0.001 <sup>b</sup> | 0.175 <sup>Aa</sup> | 0.128 <sup>Aa</sup>  |                 |                 |  |
| Ruminococcaceae  |                    |                    |                     |                     |                     |                      |                 |                 |  |
| WS               | 0.109              | 0.133              | 0.115 <sup>A</sup>  | 0.122 <sup>A</sup>  | 0.105 <sup>A</sup>  | 0.112 <sup>A</sup>   | <b>&lt;.001</b> | <b>&lt;.001</b> |  |
| WB               | 0.132              | 0.119              | 0.126 <sup>A</sup>  | 0.130 <sup>A</sup>  | 0.083 <sup>A</sup>  | 0.118 <sup>A</sup>   |                 |                 |  |
| SS               | 0.122              | 0.140              | 0.129 <sup>A</sup>  | 0.100 <sup>A</sup>  | 0.071 <sup>A</sup>  | 0.125 <sup>A</sup>   |                 |                 |  |
| SB               | 0.112 <sup>a</sup> | 0.099 <sup>b</sup> | 0.014 <sup>Bb</sup> | 0.002 <sup>Bb</sup> | 0.001 <sup>Bb</sup> | 0.007 <sup>Bb</sup>  |                 |                 |  |
| Spirochaetaceae  |                    |                    |                     |                     |                     |                      |                 |                 |  |
| WS               | 0.029              | 0.030              | 0.035 <sup>A</sup>  | 0.028 <sup>A</sup>  | 0.027 <sup>A</sup>  | 0.040 <sup>A</sup>   | <b>.002</b>     | <b>&lt;.001</b> |  |
| WB               | 0.022              | 0.028              | 0.024 <sup>A</sup>  | 0.018 <sup>A</sup>  | 0.039 <sup>A</sup>  | 0.030 <sup>A</sup>   |                 |                 |  |
| SS               | 0.026              | 0.024              | 0.018 <sup>A</sup>  | 0.011 <sup>A</sup>  | 0.017 <sup>A</sup>  | 0.011 <sup>A</sup>   |                 |                 |  |
| SB               | 0.017 <sup>a</sup> | 0.047 <sup>a</sup> | 0.006 <sup>Bb</sup> | 0.002 <sup>Bb</sup> | 0.001 <sup>Bb</sup> | <0.001 <sup>Bb</sup> |                 |                 |  |
| Streptococcaceae |                    |                    |                     |                     |                     |                      |                 |                 |  |
| WS               | 0.171              | 0.120              | 0.097 <sup>B</sup>  | 0.111 <sup>B</sup>  | 0.113               | 0.066                | <b>&lt;.001</b> | <b>&lt;.001</b> |  |
| WB               | 0.014              | 0.009              | 0.012 <sup>B</sup>  | 0.031 <sup>B</sup>  | 0.088               | 0.015                |                 |                 |  |
| SS               | 0.019              | 0.022              | 0.038 <sup>B</sup>  | 0.069 <sup>B</sup>  | 0.073               | 0.030                |                 |                 |  |
| SB               | 0.081 <sup>b</sup> | 0.074 <sup>b</sup> | 0.633 <sup>Aa</sup> | 0.625 <sup>Aa</sup> | 0.187 <sup>b</sup>  | 0.226 <sup>b</sup>   |                 |                 |  |

---

WS = water-saline; WB = water-buffer; SS = starch-saline; SB = starch-buffer. T\*T = interaction treatment/time. T0 – before administration (starch overload and/or buffer); T8 – 8 hours administration; T12 – 12 hours after administration; T24 – 24 hours after administration; T48 – 48 hours after administration; T72 – 72 hours after administration. The means are represented: different lowercase letters on the same line, and different uppercase letters in the same column differed statistically ( $p<0.05$ ; Tukey's test).

Table S4. Variation in the relative abundance of the bacterial genera in the feces of horses 72 hours following treatments.

| Genus                | Treatments | Time                |                     |                     |                      |                      |                      | Time            | T*T             |
|----------------------|------------|---------------------|---------------------|---------------------|----------------------|----------------------|----------------------|-----------------|-----------------|
|                      |            | T0                  | T8                  | T12                 | T24                  | T48                  | T72                  | P value         |                 |
| Bifidobacterium      | WS         | <0.001              | <0.001              | <0.001              | <0.001               | <0.001 <sup>B</sup>  | <0.001 <sup>B</sup>  | <b>.016</b>     | <b>.021</b>     |
|                      | WB         | <0.001              | <0.001              | <0.001              | <0.001               | <0.001 <sup>B</sup>  | <0.001 <sup>B</sup>  |                 |                 |
|                      | SS         | <0.001              | <0.001              | <0.001              | 0.001                | 0.050 <sup>B</sup>   | 0.015 <sup>B</sup>   |                 |                 |
|                      | SB         | <0.001 <sup>b</sup> | <0.001 <sup>b</sup> | <0.001 <sup>b</sup> | 0.030 <sup>b</sup>   | 0.146 <sup>Aa</sup>  | 0.194 <sup>Aa</sup>  |                 |                 |
| Clostridium_III      | WS         | 0.026               | 0.027               | 0.024 <sup>A</sup>  | 0.022 <sup>A</sup>   | 0.022 <sup>A</sup>   | 0.024 <sup>A</sup>   | <b>&lt;.001</b> | <b>&lt;.001</b> |
|                      | WB         | 0.025               | 0.020               | 0.022 <sup>A</sup>  | 0.023 <sup>A</sup>   | 0.014 <sup>A</sup>   | 0.023 <sup>A</sup>   |                 |                 |
|                      | SS         | 0.025 <sup>a</sup>  | 0.028 <sup>a</sup>  | 0.023 <sup>Aa</sup> | 0.012 <sup>Ab</sup>  | 0.011 <sup>Ab</sup>  | 0.019 <sup>Aa</sup>  |                 |                 |
|                      | SB         | 0.026 <sup>a</sup>  | 0.022 <sup>a</sup>  | 0.003 <sup>Bb</sup> | <0.001 <sup>Bb</sup> | <0.001 <sup>Bb</sup> | <0.001 <sup>Bb</sup> |                 |                 |
| Clostridium_XIVa     | WS         | 0.051               | 0.070               | 0.054 <sup>A</sup>  | 0.061 <sup>A</sup>   | 0.056 <sup>A</sup>   | 0.072 <sup>A</sup>   | <b>&lt;.001</b> | <b>&lt;.001</b> |
|                      | WB         | 0.067               | 0.065               | 0.053 <sup>A</sup>  | 0.058 <sup>A</sup>   | 0.055 <sup>A</sup>   | 0.077 <sup>A</sup>   |                 |                 |
|                      | SS         | 0.047               | 0.056               | 0.061 <sup>A</sup>  | 0.068 <sup>A</sup>   | 0.032 <sup>A</sup>   | 0.038 <sup>A</sup>   |                 |                 |
|                      | SB         | 0.061 <sup>a</sup>  | 0.065 <sup>a</sup>  | 0.008 <sup>Bb</sup> | 0.002 <sup>Bb</sup>  | 0.002 <sup>Bb</sup>  | 0.006 <sup>Bb</sup>  |                 |                 |
| Erysipelotrichaceae* | WS         | <0.001              | <0.001              | <0.001              | <0.001               | <0.001 <sup>B</sup>  | <0.001 <sup>B</sup>  | <b>.002</b>     | <b>&lt;.001</b> |
|                      | WB         | 0.001               | 0.001               | 0.001               | 0.002                | <0.001 <sup>B</sup>  | <0.001 <sup>B</sup>  |                 |                 |
|                      | SS         | 0.001               | <0.001              | 0.001               | 0.002                | 0.005 <sup>B</sup>   | 0.003 <sup>B</sup>   |                 |                 |
|                      | SB         | 0.001 <sup>b</sup>  | <0.001 <sup>b</sup> | <0.001 <sup>b</sup> | 0.002 <sup>b</sup>   | 0.183 <sup>Aa</sup>  | 0.173 <sup>Aa</sup>  |                 |                 |
| Eubacterium          | WS         | 0.015               | 0.020               | 0.015 <sup>A</sup>  | 0.014 <sup>A</sup>   | 0.015 <sup>A</sup>   | 0.013                | <b>&lt;.001</b> | <b>&lt;.001</b> |
|                      | WB         | 0.019               | 0.014               | 0.011 <sup>A</sup>  | 0.017 <sup>A</sup>   | 0.018 <sup>A</sup>   | 0.014                |                 |                 |
|                      | SS         | 0.016 <sup>a</sup>  | 0.018 <sup>a</sup>  | 0.016 <sup>Aa</sup> | 0.006 <sup>Bb</sup>  | 0.006 <sup>Bb</sup>  | 0.013 <sup>a</sup>   |                 |                 |
|                      | SB         | 0.017 <sup>a</sup>  | 0.014 <sup>a</sup>  | 0.003 <sup>Bb</sup> | 0.003 <sup>Bb</sup>  | 0.003 <sup>Bb</sup>  | 0.010 <sup>a</sup>   |                 |                 |
| Lachnospiraceae*     | WS         | 0.022               | 0.030               | 0.020 <sup>A</sup>  | 0.021 <sup>A</sup>   | 0.024 <sup>A</sup>   | 0.024 <sup>A</sup>   | <b>.027</b>     | <b>.002</b>     |
|                      | WB         | 0.025               | 0.020               | 0.019 <sup>A</sup>  | 0.028 <sup>A</sup>   | 0.017 <sup>A</sup>   | 0.033 <sup>A</sup>   |                 |                 |
|                      | SS         | 0.028               | 0.023               | 0.034 <sup>A</sup>  | 0.035 <sup>A</sup>   | 0.018 <sup>A</sup>   | 0.027 <sup>A</sup>   |                 |                 |
|                      | SB         | 0.027 <sup>a</sup>  | 0.019 <sup>a</sup>  | 0.006 <sup>Bb</sup> | 0.002 <sup>Bb</sup>  | 0.003 <sup>Bb</sup>  | 0.008 <sup>Bb</sup>  |                 |                 |
| Lactobacillus        | WS         | <0.001              | 0.001               | 0.001               | 0.001 <sup>B</sup>   | 0.002 <sup>B</sup>   | 0.001                | <b>&lt;.001</b> | <b>.001</b>     |
|                      | WB         | 0.005               | 0.004               | 0.003               | 0.007 <sup>B</sup>   | 0.036 <sup>B</sup>   | 0.015                |                 |                 |
|                      | SS         | 0.004 <sup>b</sup>  | 0.006 <sup>b</sup>  | 0.004 <sup>b</sup>  | 0.073 <sup>Bab</sup> | 0.233 <sup>Aa</sup>  | 0.046 <sup>b</sup>   |                 |                 |
|                      | SB         | 0.002 <sup>b</sup>  | 0.001 <sup>b</sup>  | 0.050 <sup>b</sup>  | 0.254 <sup>Aa</sup>  | 0.095 <sup>Aab</sup> | 0.055 <sup>b</sup>   |                 |                 |
| Methanobrevibacter   | WS         | 0.052               | 0.036               | 0.057 <sup>A</sup>  | 0.019                | 0.016 <sup>A</sup>   | 0.013 <sup>A</sup>   | <b>.002</b>     | <b>.003</b>     |
|                      | WB         | 0.046               | 0.017               | 0.027 <sup>A</sup>  | 0.037                | 0.009 <sup>A</sup>   | 0.037 <sup>A</sup>   |                 |                 |
|                      | SS         | 0.031               | 0.012               | 0.013 <sup>A</sup>  | 0.009                | 0.012 <sup>A</sup>   | 0.049 <sup>A</sup>   |                 |                 |
|                      | SB         | 0.031 <sup>a</sup>  | 0.025 <sup>a</sup>  | 0.130 <sup>Bc</sup> | 0.022 <sup>a</sup>   | 0.002 <sup>Bb</sup>  | <0.001 <sup>Bb</sup> |                 |                 |
| Prevotella           | WS         | 0.015               | 0.013               | 0.010               | 0.016                | 0.013 <sup>B</sup>   | 0.023 <sup>B</sup>   | <b>.031</b>     | <b>.003</b>     |
|                      | WB         | 0.015               | 0.023               | 0.016               | 0.014                | 0.031 <sup>B</sup>   | 0.020 <sup>B</sup>   |                 |                 |
|                      | SS         | 0.015               | 0.019               | 0.023               | 0.062                | 0.021 <sup>B</sup>   | 0.016 <sup>B</sup>   |                 |                 |
|                      | SB         | 0.014 <sup>b</sup>  | 0.021 <sup>b</sup>  | 0.002 <sup>b</sup>  | <0.001 <sup>b</sup>  | 0.175 <sup>Aa</sup>  | 0.128 <sup>Aa</sup>  |                 |                 |
| Ruminococcaceae*     | WS         | 0.037               | 0.051               | 0.047 <sup>A</sup>  | 0.049 <sup>A</sup>   | 0.046 <sup>A</sup>   | 0.045 <sup>A</sup>   | <b>&lt;.001</b> | <b>.001</b>     |
|                      | WB         | 0.062               | 0.056               | 0.061 <sup>A</sup>  | 0.069 <sup>A</sup>   | 0.037 <sup>A</sup>   | 0.057 <sup>A</sup>   |                 |                 |
|                      | SS         | 0.059               | 0.066               | 0.061 <sup>A</sup>  | 0.062 <sup>A</sup>   | 0.037 <sup>A</sup>   | 0.061 <sup>A</sup>   |                 |                 |
|                      | SB         | 0.049 <sup>a</sup>  | 0.047 <sup>a</sup>  | 0.008 <sup>Bb</sup> | 0.001 <sup>Bb</sup>  | 0.001 <sup>Bb</sup>  | 0.004 <sup>Bb</sup>  |                 |                 |
| Ruminococcus         | WS         | 0.025               | 0.035               | 0.025 <sup>A</sup>  | 0.032 <sup>A</sup>   | 0.016 <sup>A</sup>   | 0.023 <sup>A</sup>   | <b>&lt;.001</b> | <b>.050</b>     |
|                      | WB         | 0.015               | 0.017               | 0.014 <sup>A</sup>  | 0.009 <sup>A</sup>   | 0.011 <sup>A</sup>   | 0.012 <sup>A</sup>   |                 |                 |
|                      | SS         | 0.012 <sup>a</sup>  | 0.015 <sup>a</sup>  | 0.016 <sup>Aa</sup> | 0.003 <sup>Bb</sup>  | 0.003 <sup>Bb</sup>  | 0.005 <sup>Bb</sup>  |                 |                 |
|                      | SB         | 0.014 <sup>a</sup>  | 0.013 <sup>a</sup>  | 0.001 <sup>Bb</sup> | <0.001 <sup>Bb</sup> | <0.001 <sup>Bb</sup> | <0.001 <sup>Bb</sup> |                 |                 |
| Streptococcus        | WS         | 0.171               | 0.120               | 0.099 <sup>B</sup>  | 0.110 <sup>B</sup>   | 0.099                | 0.066                | <b>&lt;.001</b> | <b>.001</b>     |
|                      | WB         | 0.014               | 0.009               | 0.011 <sup>B</sup>  | 0.031 <sup>B</sup>   | 0.088                | 0.015                |                 |                 |
|                      | SS         | 0.019               | 0.022               | 0.038 <sup>B</sup>  | 0.069 <sup>B</sup>   | 0.073                | 0.030                |                 |                 |
|                      | SB         | 0.081 <sup>b</sup>  | 0.074 <sup>b</sup>  | 0.633 <sup>Aa</sup> | 0.625 <sup>Aa</sup>  | 0.187 <sup>b</sup>   | 0.126 <sup>b</sup>   |                 |                 |
| Treponema            | WS         | 0.029               | 0.030               | 0.035               | 0.028 <sup>A</sup>   | 0.027 <sup>A</sup>   | 0.040 <sup>A</sup>   | <b>.002</b>     | <b>&lt;.001</b> |
|                      | WB         | 0.022               | 0.028               | 0.024               | 0.018 <sup>A</sup>   | 0.039 <sup>A</sup>   | 0.030 <sup>A</sup>   |                 |                 |
|                      | SS         | 0.026               | 0.024               | 0.018               | 0.011 <sup>A</sup>   | 0.017 <sup>A</sup>   | 0.011 <sup>A</sup>   |                 |                 |

---

|    |                    |                    |                    |                     |                     |                      |
|----|--------------------|--------------------|--------------------|---------------------|---------------------|----------------------|
| SB | 0.017 <sup>a</sup> | 0.027 <sup>a</sup> | 0.016 <sup>a</sup> | 0.002 <sup>Bb</sup> | 0.001 <sup>Bb</sup> | <0.001 <sup>Bb</sup> |
|----|--------------------|--------------------|--------------------|---------------------|---------------------|----------------------|

---

WS = water-saline; WB = water-buffer; SS = starch-saline; SB = starch-buffer. T\*T = interaction treatment/time T0 – before gastric administration of water or starch; T8 - 08h; T12 - 12h; T24 - 24h; T48 - 48h; T72 - 72h. The means are represented: different lowercase letters on the same line, and different uppercase letters in the same column differed statistically ( $p < 0.05$ ; Tukey's test).

\*Genus not identified belonging to Family mentioned.
