# Supplementary material for: Effects of Starch Overload and Cecal Buffering on Fecal Microbiota of Horses
Source: Animals (Basel). 2022 Dec 6;12(23):3435. doi: 10.3390/ani12233435 (PMC9737938; doi:10.3390/ani12233435)
Supplement: Supplementary file 1 [file animals-12-03435-s001.zip]

Archive with 4 entries (4 files):
- Figure S1.pdf
- Table S1.pdf
- Tables S2--S4.pdf
- Tables S5--S7.pdf
